# Supplementary material for: Fabrication of NiFe-LDHs Modified Carbon Nanotubes as the High-Performance Sulfur Host for Lithium–Sulfur Batteries
Source: MDPI journal article supplement (doi:10.3390/nano14030272), 2024-01-27
Supplement: s1 [file s1]

## **Supporting Information**

### **Fabrication of NiFe-LDHs Modified Carbon Nanotubes as the High-Performance Sulfur Host for Lithium–Sulfur Batteries**

Lingwei Zhang <sup>1,2</sup>, Runlan Li <sup>1</sup> and Wenbo Yue <sup>1,\*</sup>

<sup>1</sup> Beijing Key Laboratory of Energy Conversion and Storage Materials, College of Chemistry, Beijing Normal University, Beijing 100875, P. R. China

<sup>2</sup> College of Chemistry, Xi'an Jiaotong University, Xi'an 710049, China

\*Corresponding authors:

Yue WB, Tel: +86 (0)10 58804229, E-mail: [wbyue@bnu.edu.cn](mailto:wbyue@bnu.edu.cn)

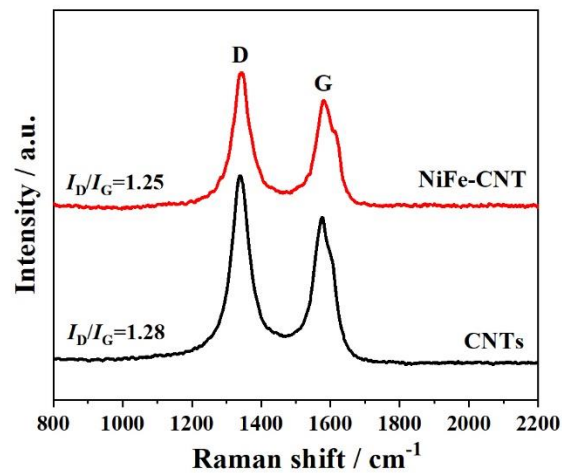

**Figure S1.** Raman spectra of NiFe-CNT and CNTs.

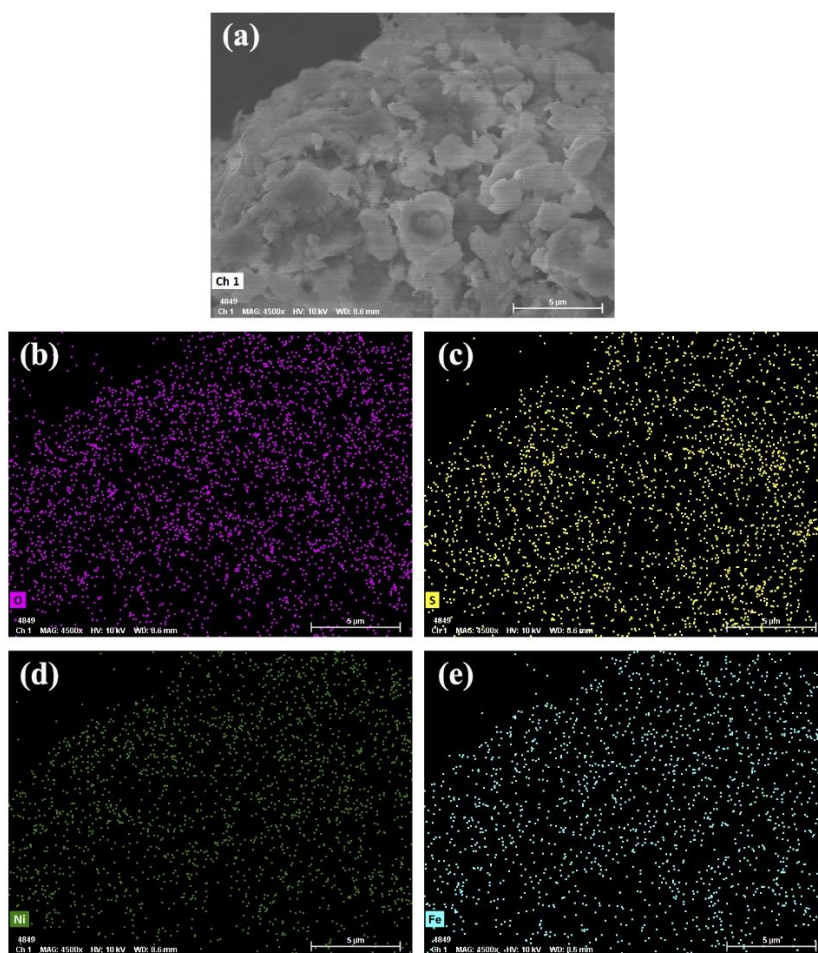

**Figure S2.** (a) SEM image of NiFe-LDH@S and EDX elemental mappings of (b) O, (c) S, (d) Ni and (e) Fe.

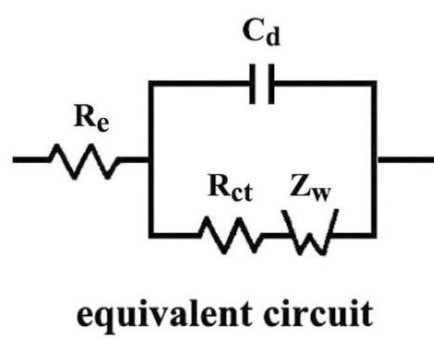

**Figure S3.** Randles equivalent circuit for NiFe-LDH@S and NiFe-CNT@S.
